# Supplementary material for: Factors influencing intention to intervene in elder abuse among nursing students
Source: PeerJ. 2021 Aug 26;9:e12079. doi: 10.7717/peerj.12079 (PMC8403473; doi:10.7717/peerj.12079)
Supplement: Supplemental Information 2 [file peerj-09-12079-s002.xlsx]

## Sheet: Sheet1
	0	1	2	3	4	5
gender		male	female
age		number
Grade		1	2	3	4
Religion		Buddhism	Christian	Catholic	No religion
Education course about elder abuse		Has taken	Not taken
Need for education		Unnecessary	Usually	Need
Experienced elder abuse		Has taken	Not taken
Intervening Elder Abuse		Has taken	Not taken
Elder abuse problem		Not very serious	not serious	serious	Very serious
Elder Abuse Reporting Act		Opposition	Agree
Awareness of elder abuse1		Strongly Disagree	Disagree	Agree	Strongly Agree
Awareness of elder abuse2		Strongly Disagree	Disagree	Agree	Strongly Agree
Awareness of elder abuse 3		Strongly Disagree	Disagree	Agree	Strongly Agree
Awareness of elder abuse 4		Strongly Disagree	Disagree	Agree	Strongly Agree
Awareness of elder abuse 5.		Strongly Disagree	Disagree	Agree	Strongly Agree
Awareness of elder abuse 6.		Strongly Disagree	Disagree	Agree	Strongly Agree
Awareness of elder abuse 7		Strongly Disagree	Disagree	Agree	Strongly Agree
Awareness of elder abuse 8.		Strongly Disagree	Disagree	Agree	Strongly Agree
Awareness of elder abuse 9		Strongly Disagree	Disagree	Agree	Strongly Agree
Awareness of elder abuse 10		Strongly Disagree	Disagree	Agree	Strongly Agree
Awareness of elder abuse 11		Strongly Disagree	Disagree	Agree	Strongly Agree
Awareness of elder abuse 12.		Strongly Disagree	Disagree	Agree	Strongly Agree
Awareness of elder abuse 13		Strongly Disagree	Disagree	Agree	Strongly Agree
Awareness of elder abuse 14		Strongly Disagree	Disagree	Agree	Strongly Agree
Awareness of elder abuse 15		Strongly Disagree	Disagree	Agree	Strongly Agree
Awareness of elder abuse 16		Strongly Disagree	Disagree	Agree	Strongly Agree
Awareness of elder abuse 17		Strongly Disagree	Disagree	Agree	Strongly Agree
Awareness of elder abuse 18		Strongly Disagree	Disagree	Agree	Strongly Agree
Awareness of elder abuse 19		Strongly Disagree	Disagree	Agree	Strongly Agree
Awareness of elder abuse 20		Strongly Disagree	Disagree	Agree	Strongly Agree
Awareness of elder abuse 21		Strongly Disagree	Disagree	Agree	Strongly Agree
Awareness of elder abuse 22		Strongly Disagree	Disagree	Agree	Strongly Agree
Awareness of elder abuse 23		Strongly Disagree	Disagree	Agree	Strongly Agree
Awareness of elder abuse 24		Strongly Disagree	Disagree	Agree	Strongly Agree
Awareness of elder abuse 25		Strongly Disagree	Disagree	Agree	Strongly Agree
Awareness of elder abuse 26		Strongly Disagree	Disagree	Agree	Strongly Agree
Awareness of elder abuse 27		Strongly Disagree	Disagree	Agree	Strongly Agree
Awareness of elder abuse 28		Strongly Disagree	Disagree	Agree	Strongly Agree
Awareness of elder abuse 29		Strongly Disagree	Disagree	Agree	Strongly Agree
Awareness of elder abuse 30		Strongly Disagree	Disagree	Agree	Strongly Agree
Awareness of elder abuse 31		Strongly Disagree	Disagree	Agree	Strongly Agree
Awareness of elder abuse 32		Strongly Disagree	Disagree	Agree	Strongly Agree
Awareness of elder abuse 33		Strongly Disagree	Disagree	Agree	Strongly Agree
Awareness of elder abuse 34		Strongly Disagree	Disagree	Agree	Strongly Agree
Awareness of elder abuse 35		Strongly Disagree	Disagree	Agree	Strongly Agree
Awareness of elder abuse 36.		Strongly Disagree	Disagree	Agree	Strongly Agree
Awareness of elder abuse 37		Strongly Disagree	Disagree	Agree	Strongly Agree
Awareness of elder abuse 38		Strongly Disagree	Disagree	Agree	Strongly Agree
Knowledge1	I don't know	I know
Knowledge2	I don't know	I know
Knowledge3	I don't know	I know
Knowledge4	I don't know	I know
Knowledge5	I don't know	I know
Knowledge6	I don't know	I know
Knowledge7	I don't know	I know
Knowledge8	I don't know	I know
Knowledge9	I don't know	I know
Knowledge10	I don't know	I know
Knowledge11	I don't know	I know
Knowledge12	I don't know	I know
Attitude1		Strongly Disagree	Disagree	Agree	Strongly Agree
Attitude2		Strongly Disagree	Disagree	Agree	Strongly Agree
Attitude3		Strongly Disagree	Disagree	Agree	Strongly Agree
Attitude4		Strongly Disagree	Disagree	Agree	Strongly Agree
Attitude5		Strongly Disagree	Disagree	Agree	Strongly Agree
Attitude6		Strongly Disagree	Disagree	Agree	Strongly Agree
Attitude7		Strongly Disagree	Disagree	Agree	Strongly Agree
Attitude8		Strongly Disagree	Disagree	Agree	Strongly Agree
Attitude9		Strongly Disagree	Disagree	Agree	Strongly Agree
Attitude10		Strongly Disagree	Disagree	Agree	Strongly Agree
Attitude11		Strongly Disagree	Disagree	Agree	Strongly Agree
Attitude12		Strongly Disagree	Disagree	Agree	Strongly Agree
Attitude13		Strongly Disagree	Disagree	Agree	Strongly Agree
Attitude14		Strongly Disagree	Disagree	Agree	Strongly Agree
Intention of intervening in elder abuse1		Strongly Disagree	Disagree	Agree	Strongly Agree
Intention of intervening in elder abuse2		Strongly Disagree	Disagree	Agree	Strongly Agree
Intention of intervening in elder abuse3		Strongly Disagree	Disagree	Agree	Strongly Agree
Intention of intervening in elder abuse4		Strongly Disagree	Disagree	Agree	Strongly Agree
Intention of intervening in elder abuse5		Strongly Disagree	Disagree	Agree	Strongly Agree
Intention of intervening in elder abuse6		Strongly Disagree	Disagree	Agree	Strongly Agree
Intention of intervening in elder abuse7		Strongly Disagree	Disagree	Agree	Strongly Agree
Intention of intervening in elder abuse8		Strongly Disagree	Disagree	Agree	Strongly Agree
Intention of intervening in elder abuse9		Strongly Disagree	Disagree	Agree	Strongly Agree
Intention of intervening in elder abuse10		Strongly Disagree	Disagree	Agree	Strongly Agree
Intention of intervening in elder abuse11		Strongly Disagree	Disagree	Agree	Strongly Agree
