# Supplementary material for: Factors influencing intention to intervene in elder abuse among nursing students
Source: PeerJ. 2021 Aug 26;9:e12079. doi: 10.7717/peerj.12079 (PMC8403473; doi:10.7717/peerj.12079)
Supplement: Supplemental Information 3 [file peerj-09-12079-s003.xlsx]

## Sheet: raw data
타임스탬프	1. 귀하의 성별은 어떻게 되십니까?	2. 귀하의 연령은 어떻게 되십니까? (만으로, 숫자만 입력 ) 예: 23	3. 귀하의 종교는 어떻게 되십니까?	4. 노인 학대와 관련된 교육을 받은 적이 있습니까?	5. 귀하는 노인학대 교육이 필요하다고 생각합니까?	6. 귀하는 알고 있는 지인중에 노인 학대 받은 경험이 있는 사람이 있습니까?	7. 학대가 의심되는 노인을 신고한 적이 있습니까?	8. 학대가 의심되는 노인을 신고하지 않은 적이 있습니까?	9. 노인학대의 문제는 어느정도라고 생각하십니까?	10. 노인학대 신고법에 대해 어떻게 생각하십니까?	1. 노인을 부양하는 것이 부담스럽다고 노인 앞에서 노골적으로 말한다.	2. 집안 의사결정 과정에서 고의로 노인을 소외시킨다.	3. 위협적이고 무례한 태도를 취한다.	4. 거동이 불편한 노인에게 청소나 빨래 등과 같은 어려운 일을 강요한다.	5. 노인의 친구나 친지 등이 방문하는 것을 싫어한다.	6. 노인이 보는 앞에서 물건을 던지거나 부수면서 화풀이를 한다.	7. 노인이 가족을 타이르거나 의견을 말하면 간섭한다고 불평하거나 화를 낸다.	8. 노인의 일상적 사회활동이나 종교활동 등을 노골적으로 방해한다.	9. 노인에게 발을 구르거나 방문을 세게 닫는 등 거친 행동을 한다.	10. 부양자가 노인에게 없어져 주었으면 하는 느낌을 갖게 한다.	11. 노인이 수치심을 느끼게 하는 모욕적인 말을 한다.	12. 노인에게 집을 나가라는 폭언을 한다.	13. 노인에게 욕설로 말하거나 고함을 지른다.	14. 노인에게 쓸모 없는 늙은이 라고 하는 등 자존심을 상하게 하는 말을 한다.	15. 신체기능의 저하로 인한 노인의 실수를 비난하고 꾸짖는다.(예 : 요실금, 실변 등)	16. 노인을 양로원 등의 시설로 보내겠다고 위협한다.	17. 노인을 강제로 지하실이나 방에 가둔다.	18. 노인을 강제로 의자나 침대에 묶어 둔다.	19. 노인에게 주변의 물건을 집어던지거나 흉기로 위협한다.	20. 노인을 발로 차거나 주먹으로 때린다.	21. 노인을 밀어서 넘어뜨린다.	22. 노인의 머리채를 잡아당기거나 움켜잡아 뽑는다.	23. 의사의 처방을 받은 약품을 주지 않거나 의사의 처방을 받지 않은 약물을 강제로 복용시킨다.	24. 노인의 유언장을 허위로 작성하거나 노인이 작성한 유언장을 노인의 동의 없이 임의로 수정한다.	25. 노인의 허락 없이 부양자가 마음대로 노인의 부동산 소유권 이전 등과 같은 재산권을 행사한다.	26. 연금이나 임대료 등 노인의 소득을 가족이나 친지가 가로챈다.	27. 노인에게서 빌린 돈을 갚지 않거나 물건을 돌려주지 않는다.	28. 보석 등 값나가는 노인의 물건을 강제로 빼앗는다.	29. 노인의 허락 없이 노인의 재산을 담보로 해서 대출을 받는다.	30. 생활이 어려운 노인에게 생활을 유지하는데 필요한 용돈이나 생활비 등을 주지 않는다.	31. 병원에서 치료를 받아야 할 상황인데도 노인을 병원에 모셔가지 않는다.	32. 노인이 사고를 당할 수 있는 위험한 상황에 처하게 한다.	33. 목욕이나 배변시 도움이 필요한 노인에게 도움을 제공하지 않는다.	34. 노인에게 음식을 주지 않아 끼니를 거르게 한다.	35. 부양자가 경제적인 능력이 있음에도 불구하고 필수적인 보장구를 마련해 드리지 않는다.(예 : 돋보기, 보청기, 틀니 등)	36. 부양자나 가족들이 노인에게 무관심하거나 냉담하게 대한다.	37. 치매 등으로 인하여 인지기능을 상실한 노인에게 주의를 기울이지 않아 노인을 거리에서 배회하게 한다.	38. 거동이 불편한 노인을 이틀 내지는 삼일 이상 혼자 집에 내버려둔다.	1. 간호사는 노인복지법에 노인학대 신고의무자로 명시되어 있다.
2020-07-09 02:27:47	female	20	Christian	Not taken	Usually	Not taken	Not taken	Not taken	3	Agree	3	2	4	4	2	4	3	3	4	4	4	4	4	4	4	4	4	4	4	4	4	4	4	4	4	4	4	4	4	4	4	4	4	4	4	3	4	4	I don't know
2020-07-10 02:35:42	female	22	Christian	Not taken	Usually	Not taken	Not taken	Not taken	3	Agree	3	3	4	3	3	4	4	3	3	3	3	3	4	3	3	3	3	4	4	4	4	4	3	4	4	3	3	3	3	4	3	3	4	4	4	4	3	3	I don't know
2020-07-11 17:43:55	female	21	No religion	Not taken	Usually	Not taken	Not taken	Not taken	3	Agree	4	3	4	3	3	4	4	4	4	4	4	4	4	4	4	4	4	4	4	4	4	4	4	4	4	3	4	4	3	4	4	4	3	4	4	3	4	4	I know
2020-07-11 17:45:10	female	22	No religion	Not taken	Need	Not taken	Not taken	Not taken	5	Agree	3	4	4	4	2	4	4	4	4	4	4	4	4	4	4	3	4	4	4	4	4	4	4	4	4	4	4	4	4	4	4	4	4	4	4	3	4	4	I know
2020-07-11 17:45:33	female	20	No religion	Not taken	Need	Not taken	Not taken	Not taken	5	Agree	3	4	4	4	3	4	4	4	4	4	4	4	4	4	4	4	4	4	4	4	4	4	4	4	4	4	4	4	4	4	4	4	4	4	4	4	4	4	I don't know
2020-07-11 17:55:20	female	20	Buddhism	Not taken	Need	Not taken	Not taken	Not taken	4	Agree	3	4	4	4	3	4	4	4	3	4	4	4	4	4	4	4	4	4	4	4	4	4	4	4	4	4	4	4	4	4	4	4	4	4	4	4	4	4	I don't know
2020-07-11 18:16:38	female	22	No religion	Not taken	Need	Not taken	Not taken	Not taken	4	Agree	4	3	4	3	2	4	4	3	4	4	4	4	4	4	3	4	4	4	4	4	4	4	4	4	4	4	4	4	4	4	4	4	4	4	4	4	3	4	I know
2020-07-11 18:28:02	female	22	Catholic	Not taken	Usually	Not taken	Not taken	Not taken	3	Agree	3	3	4	3	2	3	3	4	3	3	4	4	4	3	4	3	4	4	4	4	4	4	4	4	4	4	3	4	4	4	3	4	3	4	4	3	4	4	I don't know
2020-07-11 19:04:11	female	22	No religion	Not taken	Need	Not taken	Not taken	Not taken	4	Agree	4	3	4	3	3	4	3	4	4	4	4	4	4	4	4	4	4	4	4	4	4	4	4	4	4	4	4	4	4	4	4	4	4	4	4	4	3	4	I don't know
2020-07-11 19:21:53	female	20	Catholic	Not taken	Usually	Not taken	Not taken	Has taken	4	Agree	4	4	4	4	4	4	4	4	4	4	4	4	4	4	4	4	4	4	4	4	4	4	4	4	4	4	4	4	4	4	4	4	4	4	4	4	4	4	I don't know
2020-07-11 20:37:03	female	22	No religion	Not taken	Need	Not taken	Not taken	Not taken	3	Agree	3	3	4	3	3	4	4	4	4	4	4	4	4	3	4	4	4	4	4	4	4	4	4	4	4	4	3	4	4	4	4	4	4	4	4	4	4	4	I know
2020-07-11 21:09:02	female	21	No religion	Not taken	Need	Not taken	Not taken	Not taken	5	Agree	3	4	3	4	3	4	4	4	3	4	4	4	4	4	4	3	4	4	4	4	4	4	4	4	4	4	4	4	4	4	4	4	4	4	4	4	4	4	I know
2020-07-11 21:29:38	female	20	Christian	Not taken	Need	Not taken	Not taken	Not taken	4	Agree	3	3	3	3	3	4	3	3	3	3	4	4	4	4	4	4	4	4	4	4	4	4	4	4	4	4	4	4	4	4	4	4	4	4	4	4	4	4	I know
2020-07-13 10:10:01	female	20	Christian	Has taken	Usually	Not taken	Not taken	Not taken	3	Agree	3	3	4	4	3	4	3	4	4	4	4	4	4	4	4	4	4	4	4	4	4	4	4	4	4	3	3	4	4	4	4	4	4	4	4	3	4	3	I don't know
2020-07-13 10:11:35	female	21	No religion	Not taken	Need	Not taken	Not taken	Not taken	4	Agree	4	4	4	4	2	4	4	4	4	4	4	4	4	4	3	4	4	4	4	4	4	4	4	4	4	4	4	4	4	4	4	4	4	4	4	4	4	4	I know
2020-07-13 10:15:29	female	20	Christian	Not taken	Usually	Not taken	Not taken	Not taken	3	Agree	4	3	4	4	3	4	3	4	4	4	4	4	4	4	4	4	4	4	4	4	4	4	4	4	4	4	4	4	4	4	4	4	4	4	4	4	4	4	I don't know
2020-07-13 10:16:01	female	20	No religion	Not taken	Usually	Not taken	Not taken	Not taken	4	Agree	3	3	4	4	2	4	3	4	4	4	4	4	4	4	4	4	4	4	4	4	4	4	4	2	3	3	3	4	3	3	4	4	3	4	3	3	3	4	I know
2020-07-13 10:18:21	female	20	No religion	Not taken	Need	Not taken	Not taken	Not taken	3	Agree	3	3	4	4	3	4	3	4	4	4	4	4	4	4	4	4	4	4	4	4	4	4	4	4	4	3	4	4	4	4	4	4	4	4	3	4	4	4	I know
2020-07-13 10:24:42	female	20	Christian	Not taken	Need	Not taken	Not taken	Not taken	4	Agree	3	4	4	4	2	3	3	4	3	4	4	4	4	4	4	4	4	4	4	4	4	4	4	4	4	4	4	4	4	4	4	4	4	4	4	4	4	4	I know
2020-07-13 10:26:59	female	22	No religion	Not taken	Need	Not taken	Not taken	Not taken	4	Agree	2	2	4	4	1	4	2	3	4	4	4	4	4	4	3	4	4	4	4	4	4	4	4	4	3	4	3	4	4	4	4	4	4	4	3	3	4	4	I don't know
2020-07-13 10:30:00	female	28	No religion	Not taken	Need	Not taken	Not taken	Not taken	5	Agree	3	3	4	4	3	3	4	4	4	4	4	4	4	4	4	4	4	4	4	4	4	4	4	4	4	4	4	4	4	4	4	4	4	4	4	4	4	4	I know
2020-07-13 10:37:27	female	23	No religion	Not taken	Need	Not taken	Not taken	Not taken	4	Agree	3	3	4	4	2	4	4	3	4	4	4	4	4	4	4	4	4	4	4	4	4	4	4	4	4	4	4	4	4	4	4	4	4	4	4	4	4	3	I don't know
2020-07-13 10:42:19	female	20	Christian	Has taken	Usually	Not taken	Not taken	Not taken	4	Agree	4	3	4	4	2	4	3	3	4	4	4	4	4	4	4	4	4	4	4	4	4	4	4	4	3	4	4	4	4	4	4	4	4	4	4	4	4	4	I don't know
2020-07-13 10:42:38	male	23	Catholic	Not taken	Usually	Not taken	Not taken	Not taken	3	Opposition	2	4	4	4	4	4	4	4	4	4	4	4	4	4	4	4	4	4	4	4	4	4	4	4	4	4	4	4	4	4	4	4	3	4	4	3	4	2	I don't know
2020-07-13 10:43:23	female	23	Christian	Not taken	Need	Not taken	Not taken	Not taken	5	Agree	4	4	4	4	4	4	4	4	4	4	4	4	4	4	4	4	4	4	4	4	4	4	4	4	4	4	4	4	4	4	4	4	4	4	4	4	4	4	I know
2020-07-13 10:48:36	female	21	Buddhism	Not taken	Need	Not taken	Not taken	Not taken	5	Agree	4	4	4	4	3	4	4	4	4	4	4	4	4	4	4	4	4	4	4	4	4	4	4	4	4	4	4	4	4	4	4	4	4	4	4	4	4	4	I know
2020-07-13 10:50:32	female	20	Christian	Not taken	Usually	Not taken	Not taken	Not taken	4	Agree	4	4	4	4	4	4	4	3	4	4	4	4	4	4	4	4	4	4	4	4	4	4	4	4	4	4	4	4	4	3	4	4	4	4	4	3	4	4	I don't know
2020-07-13 11:05:08	female	20	Catholic	Not taken	Need	Not taken	Not taken	Not taken	4	Agree	3	3	4	4	4	4	4	4	4	4	4	4	4	4	4	4	4	4	4	4	4	4	4	4	4	4	4	4	4	4	4	4	4	4	4	4	4	4	I don't know
2020-07-13 11:11:14	female	54	No religion	Not taken	Need	Not taken	Not taken	Not taken	5	Agree	2	2	4	3	3	4	3	3	4	4	4	4	4	4	4	3	4	4	4	4	4	4	4	4	4	4	4	4	4	3	4	4	4	4	3	3	4	4	I don't know
2020-07-13 11:16:28	male	25	No religion	Not taken	Need	Not taken	Not taken	Not taken	5	Agree	4	4	4	4	3	4	4	4	4	4	4	4	4	4	4	4	4	4	4	4	4	4	4	4	4	4	4	4	4	4	4	4	4	4	4	4	4	4	I know
2020-07-13 11:17:30	female	21	No religion	Not taken	Need	Not taken	Not taken	Not taken	5	Agree	3	4	4	4	4	4	4	4	4	4	4	4	4	4	4	4	4	4	4	4	4	4	4	4	4	4	4	4	4	4	4	4	4	4	4	4	4	4	I know
2020-07-13 11:21:25	female	20	Catholic	Not taken	Usually	Not taken	Not taken	Not taken	4	Agree	3	4	4	4	3	4	3	3	4	4	4	4	4	4	4	4	4	4	4	4	4	4	4	4	4	3	3	4	4	4	4	4	4	4	4	3	4	4	I know
2020-07-13 11:29:52	female	20	No religion	Not taken	Usually	Not taken	Not taken	Not taken	4	Agree	4	4	4	4	3	4	4	4	4	4	4	4	4	4	4	4	4	4	4	4	4	4	4	4	4	4	4	4	4	4	4	4	4	4	3	4	4	4	I know
2020-07-13 11:43:44	female	20	Christian	Has taken	Need	Not taken	Not taken	Not taken	5	Agree	3	4	4	4	3	4	3	3	4	4	4	4	4	3	3	3	4	4	4	4	4	4	4	4	3	3	3	4	4	4	4	4	3	4	3	4	4	4	I know
2020-07-13 11:46:49	female	23	No religion	Not taken	Need	Not taken	Not taken	Not taken	5	Agree	4	4	4	4	3	4	4	4	4	4	4	4	4	4	4	4	4	4	4	4	4	4	4	4	4	4	4	4	4	4	4	4	4	4	4	4	4	4	I know
2020-07-13 12:17:12	female	21	No religion	Not taken	Need	Not taken	Not taken	Not taken	5	Agree	4	4	4	4	4	4	4	4	4	4	4	4	4	4	4	4	4	4	4	4	4	4	4	4	4	4	4	4	4	4	4	4	4	4	4	4	4	4	I know
2020-07-13 12:18:55	female	22	No religion	Not taken	Need	Not taken	Not taken	Not taken	5	Agree	3	3	3	3	4	3	3	2	4	4	4	4	4	4	4	3	4	4	3	4	4	4	4	3	3	4	4	4	4	4	4	4	4	4	4	4	4	4	I don't know
2020-07-13 12:30:10	male	23	Catholic	Not taken	Usually	Not taken	Not taken	Not taken	4	Agree	3	3	4	2	3	4	2	4	3	3	4	4	4	3	4	4	4	4	4	4	4	4	4	4	4	4	4	4	4	3	4	4	3	4	4	3	4	4	I know
2020-07-13 12:34:21	female	20	No religion	Not taken	Usually	Not taken	Not taken	Not taken	4	Agree	4	3	4	4	3	4	4	4	4	2	4	4	4	4	4	4	4	4	4	4	4	4	4	4	4	4	4	4	4	3	4	4	4	4	3	4	3	4	I don't know
2020-07-13 12:47:03	female	22	Buddhism	Not taken	Need	Has taken	Not taken	Has taken	5	Agree	4	4	4	4	4	4	4	4	4	4	4	4	4	4	4	4	4	4	4	4	4	4	4	4	4	4	3	4	4	4	4	4	4	4	4	4	4	4	I know
2020-07-13 12:49:36	female	21	No religion	Not taken	Usually	Not taken	Not taken	Not taken	4	Agree	4	4	4	4	4	4	4	4	4	4	4	4	4	4	4	4	4	4	4	4	4	4	4	4	4	4	4	4	4	3	4	4	4	4	4	4	4	4	I don't know
2020-07-13 13:25:52	female	22	No religion	Not taken	Usually	Not taken	Not taken	Not taken	3	Agree	4	4	4	4	4	4	4	4	4	4	4	4	4	4	4	4	4	4	4	4	4	4	4	4	4	4	4	4	4	4	4	4	4	4	4	4	4	4	I know
2020-07-13 13:38:14	female	21	No religion	Not taken	Need	Not taken	Not taken	Not taken	3	Agree	3	3	4	3	2	4	3	4	3	4	4	4	4	4	3	3	4	4	4	4	4	4	4	4	3	3	4	4	4	4	4	4	3	4	3	3	3	4	I know
2020-07-13 14:35:52	male	20	No religion	Not taken	Usually	Not taken	Not taken	Not taken	4	Agree	3	3	4	4	3	4	4	4	4	4	4	4	4	4	4	4	4	4	4	4	4	4	4	4	4	4	4	4	4	4	4	4	4	4	4	4	4	4	I know
2020-07-13 15:26:11	female	20	No religion	Not taken	Need	Not taken	Not taken	Not taken	5	Agree	3	3	3	4	3	4	3	4	4	3	4	4	4	4	4	4	4	4	4	4	4	4	4	4	4	4	4	4	4	4	4	4	4	4	4	4	4	4	I know
2020-07-13 16:22:36	female	21	Christian	Not taken	Need	Not taken	Not taken	Not taken	4	Agree	3	3	4	4	2	3	3	3	3	4	4	3	4	4	3	3	4	4	4	4	4	4	4	4	3	3	3	4	3	4	4	4	4	4	4	4	4	4	I know
2020-07-13 17:18:04	male	24	Christian	Has taken	Need	Not taken	Not taken	Has taken	5	Agree	3	3	4	4	3	3	4	4	4	4	4	4	4	4	4	3	4	4	4	4	4	4	4	4	3	4	4	4	4	4	4	4	3	4	4	4	4	4	I know
2020-07-13 17:22:13	female	20	Christian	Not taken	Need	Not taken	Not taken	Not taken	5	Agree	3	3	4	4	3	4	4	4	3	4	4	4	4	4	3	4	4	4	4	4	4	4	4	3	3	4	4	4	3	4	4	4	4	4	4	4	4	4	I know
2020-07-13 17:23:36	female	20	No religion	Not taken	Usually	Not taken	Not taken	Not taken	3	Agree	2	3	4	3	3	4	3	3	3	4	4	4	4	4	4	4	4	4	4	4	4	4	4	4	4	4	4	4	4	4	4	4	3	4	4	4	4	4	I know
2020-07-13 17:24:32	female	27	No religion	Not taken	Usually	Not taken	Not taken	Not taken	4	Agree	4	3	3	4	3	4	3	3	4	4	4	4	4	4	4	3	4	4	4	4	4	4	3	3	4	4	4	4	4	4	3	4	3	4	3	3	3	4	I know
2020-07-13 17:27:57	female	21	No religion	Not taken	Need	Not taken	Not taken	Not taken	4	Agree	2	3	4	3	2	4	2	3	3	4	4	4	4	4	3	4	4	4	4	4	4	4	4	4	4	4	3	4	4	3	4	4	4	4	3	3	4	3	I don't know
2020-07-13 17:28:54	female	21	No religion	Not taken	Need	Not taken	Not taken	Not taken	5	Agree	3	2	4	4	2	4	4	4	4	4	4	4	4	4	4	3	4	4	4	4	4	4	4	4	4	4	4	4	4	4	4	4	4	4	3	3	4	4	I know
2020-07-13 17:30:27	female	23	No religion	Not taken	Usually	Not taken	Not taken	Not taken	5	Agree	3	2	4	4	3	4	3	3	4	4	4	4	4	4	4	4	4	4	4	4	4	4	4	4	4	4	4	4	4	4	4	4	4	4	4	4	4	4	I know
2020-07-13 17:38:35	female	28	Christian	Not taken	Usually	Not taken	Not taken	Not taken	4	Agree	3	4	4	3	4	3	3	3	4	3	4	4	4	4	3	4	4	4	4	4	4	4	4	4	4	4	4	4	4	3	4	3	4	4	4	4	3	4	I know
2020-07-13 18:06:46	female	20	No religion	Not taken	Need	Not taken	Not taken	Not taken	4	Agree	3	3	4	3	2	4	3	2	3	4	4	4	4	3	2	3	4	4	4	4	4	4	4	3	3	3	3	3	3	4	4	4	2	4	3	4	4	4	I know
2020-07-13 18:21:28	female	21	No religion	Not taken	Need	Not taken	Not taken	Not taken	5	Agree	3	3	4	4	3	4	4	4	4	4	4	4	4	4	4	4	4	4	4	4	4	4	4	4	4	4	4	4	4	4	4	4	3	4	3	4	3	4	I know
2020-07-13 18:23:06	female	21	No religion	Not taken	Need	Not taken	Not taken	Not taken	4	Agree	4	2	4	4	2	4	3	4	4	4	4	4	4	4	4	4	4	4	4	4	4	4	4	2	3	3	2	3	3	4	4	4	4	4	4	4	4	4	I know
2020-07-13 19:02:12	female	29	Buddhism	Not taken	Usually	Not taken	Not taken	Not taken	4	Agree	3	3	4	3	3	4	3	3	3	3	3	3	4	3	3	3	4	4	4	4	4	4	4	3	4	4	3	3	3	3	4	3	3	4	3	3	4	4	I know
2020-07-13 19:27:16	female	20	Catholic	Not taken	Usually	Not taken	Not taken	Not taken	4	Agree	3	3	3	4	2	4	3	3	4	3	4	4	4	4	4	3	4	4	4	4	4	4	4	3	3	4	4	4	3	3	4	4	3	4	2	3	3	4	I don't know
2020-07-13 23:44:59	female	21	Christian	Not taken	Need	Not taken	Not taken	Not taken	4	Agree	4	4	4	4	4	4	3	4	4	4	4	4	4	4	4	4	4	4	4	4	4	4	4	4	4	4	4	4	4	4	4	4	4	4	4	4	4	4	I don't know
2020-07-14 10:12:03	female	20	Christian	Not taken	Need	Not taken	Not taken	Not taken	5	Agree	4	4	4	3	4	4	3	4	3	4	4	4	4	4	4	4	4	4	4	4	4	4	4	4	4	4	3	4	4	4	4	3	4	3	4	3	3	4	I don't know
2020-07-14 10:25:09	female	22	Christian	Has taken	Need	Not taken	Not taken	Not taken	4	Agree	4	3	4	4	3	4	4	3	4	4	4	4	4	4	4	4	4	4	4	4	4	4	4	4	4	4	4	4	4	4	4	4	4	4	4	4	4	4	I know
2020-07-15 01:37:49	female	22	No religion	Not taken	Usually	Not taken	Not taken	Not taken	4	Agree	3	3	4	4	2	3	3	4	3	3	4	4	4	4	4	4	4	4	4	4	4	4	4	4	4	3	3	4	3	4	4	4	4	4	4	4	4	4	I know
2020-07-16 14:41:45	female	21	Christian	Not taken	Need	Not taken	Not taken	Not taken	4	Agree	3	3	4	4	2	4	2	3	4	4	4	4	4	4	3	4	4	4	4	4	4	4	4	4	3	4	4	4	4	4	4	4	4	4	4	4	4	4	I know
2020-07-17 18:02:30	male	23	No religion	Not taken	Usually	Not taken	Not taken	Not taken	4	Agree	3	4	4	3	2	4	3	3	2	3	3	3	3	3	3	4	4	4	4	4	4	4	4	3	3	3	3	4	3	3	3	4	3	3	3	3	3	4	I know
2020-07-17 18:17:22	male	28	Christian	Has taken	Need	Not taken	Not taken	Not taken	4	Agree	3	4	4	2	1	4	3	3	4	4	4	4	4	4	4	4	4	4	4	4	4	4	4	4	4	4	4	4	4	4	4	4	4	4	4	4	4	4	I know
2020-07-19 16:48:25	female	21	Catholic	Not taken	Need	Not taken	Not taken	Not taken	5	Agree	3	3	4	4	2	4	3	3	4	4	4	4	4	3	4	4	4	4	4	4	4	4	4	4	4	4	4	4	4	3	4	4	4	4	3	4	4	4	I know
2020-07-19 19:32:47	female	21	No religion	Not taken	Usually	Not taken	Not taken	Not taken	3	Agree	2	2	4	4	3	4	3	3	3	4	4	4	4	4	4	4	4	4	4	4	4	4	4	3	3	4	4	4	4	3	4	4	4	4	4	4	3	4	I know
2020-07-20 10:50:10	female	26	No religion	Not taken	Need	Not taken	Not taken	Not taken	4	Agree	4	4	4	3	2	4	2	4	4	4	4	4	4	4	4	4	4	4	4	4	4	4	4	4	4	4	4	4	4	4	4	4	4	4	4	4	4	4	I know
2020-07-20 10:50:23	female	23	Buddhism	Not taken	Unnecessary	Not taken	Not taken	Not taken	2	Agree	2	2	4	2	2	4	2	2	4	4	4	4	4	3	4	4	4	4	4	4	4	4	4	3	3	3	4	4	4	4	4	4	3	4	2	2	4	4	I don't know
2020-07-20 11:03:19	female	22	Christian	Not taken	Need	Not taken	Not taken	Not taken	4	Agree	2	3	4	4	3	4	1	4	4	4	4	4	4	4	4	4	4	4	4	4	4	4	4	4	4	4	4	4	4	3	3	4	4	4	4	3	4	4	I don't know
2020-07-20 11:25:28	female	21	Catholic	Not taken	Need	Not taken	Not taken	Not taken	4	Agree	4	4	4	4	4	4	3	4	4	4	4	4	4	4	4	4	4	4	4	4	4	4	4	4	4	4	4	4	4	4	4	4	3	4	4	4	4	4	I know
2020-07-20 11:33:13	female	20	Catholic	Not taken	Usually	Not taken	Not taken	Not taken	4	Agree	3	3	3	4	3	4	3	4	4	4	4	4	4	4	3	3	4	4	4	4	4	4	4	3	4	4	3	4	4	4	4	4	4	4	3	3	3	3	I know
2020-07-20 11:39:10	female	21	No religion	Not taken	Need	Not taken	Not taken	Not taken	4	Agree	3	3	4	4	2	4	3	4	4	4	4	4	4	4	4	4	4	4	4	4	4	4	4	4	4	4	4	4	3	3	4	4	3	4	4	3	4	4	I don't know
2020-07-20 12:23:32	female	22	No religion	Not taken	Usually	Not taken	Not taken	Not taken	4	Agree	2	3	3	4	2	4	2	3	3	3	3	4	4	3	4	4	4	4	4	4	4	4	4	3	2	3	2	3	3	1	2	3	3	3	3	2	3	3	I know
2020-07-20 12:47:48	female	21	No religion	Not taken	Need	Not taken	Not taken	Not taken	5	Agree	4	4	4	4	3	4	4	3	4	4	4	4	4	4	4	4	4	4	4	4	4	4	4	3	3	4	4	4	4	4	4	4	4	4	4	4	4	4	I know
2020-07-20 12:50:03	male	20	Christian	Not taken	Need	Not taken	Not taken	Not taken	5	Agree	3	3	3	3	3	4	4	4	4	3	4	4	4	4	4	4	4	4	4	4	4	4	4	4	4	4	4	4	4	4	4	4	4	4	4	4	4	4	I don't know
2020-07-20 12:57:26	male	21	Christian	Not taken	Need	Not taken	Not taken	Not taken	4	Agree	3	4	4	4	4	4	3	4	4	4	4	4	4	4	4	4	4	3	4	4	4	4	4	4	4	4	4	4	4	4	4	4	4	3	3	3	4	4	I don't know
2020-07-20 13:04:32	female	20	No religion	Not taken	Need	Not taken	Not taken	Not taken	5	Agree	2	3	4	4	3	4	4	4	4	4	4	4	4	4	4	4	4	4	4	4	4	4	4	4	4	4	4	4	4	4	4	4	4	4	4	4	4	4	I know
2020-07-20 13:09:24	female	20	Christian	Not taken	Need	Not taken	Not taken	Not taken	5	Agree	3	3	4	4	3	4	4	4	4	4	4	4	4	4	4	4	4	4	4	4	4	4	4	4	4	4	4	4	4	4	4	4	4	4	4	4	4	4	I know
2020-07-20 13:21:07	female	20	No religion	Not taken	Need	Not taken	Not taken	Not taken	5	Agree	2	3	4	4	4	4	4	4	4	4	4	4	4	4	4	4	4	4	4	4	4	4	4	4	4	4	4	4	4	4	4	4	4	4	4	4	4	4	I don't know
2020-07-20 13:57:02	female	21	Christian	Not taken	Usually	Not taken	Not taken	Not taken	4	Agree	2	3	3	4	3	4	4	4	4	4	4	4	4	4	4	3	4	4	4	4	4	4	4	4	3	3	4	4	4	3	4	4	4	4	3	3	4	4	I know
2020-07-20 16:01:22	female	21	No religion	Has taken	Need	Not taken	Not taken	Not taken	4	Agree	3	4	4	4	4	4	4	4	4	4	4	4	4	4	4	4	4	4	4	4	4	4	4	4	4	4	4	4	4	4	4	4	4	4	4	4	4	4	I know
2020-07-20 19:03:08	male	22	No religion	Not taken	Usually	Not taken	Not taken	Not taken	4	Agree	3	3	4	3	2	4	4	3	4	3	4	4	4	4	3	2	4	3	4	4	4	4	4	4	4	4	4	4	4	3	4	4	4	4	3	3	2	3	I don't know
2020-07-20 21:12:29	female	22	No religion	Not taken	Usually	Not taken	Not taken	Not taken	4	Agree	4	3	4	3	2	3	3	3	4	4	4	4	4	4	3	4	4	4	4	4	4	4	4	4	4	4	4	4	4	4	4	4	4	4	4	3	3	4	I don't know
2020-07-21 14:04:41	female	23	Christian	Not taken	Need	Not taken	Not taken	Not taken	4	Agree	4	4	4	4	3	4	3	3	4	4	4	4	4	4	4	4	4	4	4	4	4	4	4	4	4	4	4	4	4	4	4	4	4	4	4	4	4	4	I don't know
2020-07-21 14:09:09	female	22	Christian	Not taken	Need	Not taken	Not taken	Not taken	5	Agree	3	3	4	3	3	4	3	3	4	3	4	4	4	4	4	4	4	4	4	4	4	4	4	4	3	4	4	4	4	3	4	4	3	4	3	3	4	4	I don't know
2020-07-21 14:24:05	female	22	Christian	Not taken	Need	Not taken	Not taken	Not taken	5	Agree	3	4	4	4	2	4	4	3	4	4	4	4	4	4	4	4	4	4	4	4	4	4	4	4	4	4	4	4	4	4	4	4	4	4	4	4	4	4	I know
2020-07-21 14:46:38	female	20	Christian	Not taken	Usually	Not taken	Not taken	Not taken	3	Agree	3	2	4	4	2	4	3	3	4	4	4	4	4	4	4	4	4	4	4	4	4	4	4	4	4	4	4	4	4	4	4	4	4	4	4	3	4	4	I don't know
2020-07-21 14:54:38	female	22	Christian	Not taken	Usually	Not taken	Not taken	Not taken	3	Agree	3	3	4	3	3	4	4	3	3	3	3	3	4	3	3	3	3	4	4	4	4	4	3	4	4	3	3	3	3	4	3	3	4	4	4	4	3	3	I don't know
2020-07-21 14:59:08	female	20	Christian	Has taken	Usually	Not taken	Not taken	Not taken	3	Agree	3	3	4	4	3	4	3	4	4	4	4	4	4	4	4	4	4	4	4	4	4	4	4	4	4	3	3	4	4	4	4	4	4	4	4	3	4	3	I don't know
2020-07-21 15:26:47	female	21	No religion	Not taken	Need	Not taken	Not taken	Not taken	4	Agree	4	4	4	4	2	4	4	4	4	4	4	4	4	4	3	4	4	4	4	4	4	4	4	4	4	4	4	4	4	4	4	4	4	4	4	4	4	4	I know
2020-07-21 15:40:55	female	20	Christian	Not taken	Usually	Not taken	Not taken	Not taken	3	Agree	4	3	4	4	3	4	3	4	4	4	4	4	4	4	4	4	4	4	4	4	4	4	4	4	4	4	4	4	4	4	4	4	4	4	4	4	4	4	I don't know
2020-07-21 15:45:16	female	20	No religion	Not taken	Usually	Not taken	Not taken	Not taken	4	Agree	3	3	4	4	2	4	3	4	4	4	4	4	4	4	4	4	4	4	4	4	4	4	4	2	3	3	3	4	3	3	4	4	3	4	3	3	3	4	I know
2020-07-21 15:45:32	female	20	No religion	Not taken	Need	Not taken	Not taken	Not taken	3	Agree	3	3	4	4	3	4	3	4	4	4	4	4	4	4	4	4	4	4	4	4	4	4	4	4	4	3	4	4	4	4	4	4	4	4	3	4	4	4	I know
2020-07-21 15:46:43	female	20	Christian	Not taken	Need	Not taken	Not taken	Not taken	4	Agree	3	4	4	4	2	3	3	4	3	4	4	4	4	4	4	4	4	4	4	4	4	4	4	4	4	4	4	4	4	4	4	4	4	4	4	4	4	4	I know
2020-07-21 15:46:55	female	21	Christian	Has taken	Usually	Not taken	Not taken	Not taken	4	Agree	4	3	4	4	2	4	3	3	4	4	4	4	4	4	4	4	4	4	4	4	4	4	4	4	3	4	4	4	4	4	4	4	4	4	4	4	4	4	I don't know
2020-07-21 15:51:27	male	23	Catholic	Not taken	Usually	Not taken	Not taken	Not taken	3	Opposition	2	4	4	4	4	4	4	4	4	4	4	4	4	4	4	4	4	4	4	4	4	4	4	4	4	4	4	4	4	4	4	4	3	4	4	3	4	2	I don't know
2020-07-21 15:57:04	female	23	Christian	Not taken	Need	Not taken	Not taken	Not taken	5	Agree	4	4	4	4	4	4	4	4	4	4	4	4	4	4	4	4	4	4	4	4	4	4	4	4	4	4	4	4	4	4	4	4	4	4	4	4	4	4	I know
2020-07-21 16:35:05	female	20	Catholic	Not taken	Need	Not taken	Not taken	Not taken	4	Agree	3	3	4	4	4	4	4	4	4	4	4	4	4	4	4	4	4	4	4	4	4	4	4	4	4	4	4	4	4	4	4	4	4	4	4	4	4	4	I don't know
2020-07-21 17:46:20	female	54	No religion	Not taken	Need	Not taken	Not taken	Not taken	5	Agree	2	2	4	3	3	4	3	3	4	4	4	4	4	4	4	3	4	4	4	4	4	4	4	4	4	4	4	4	4	3	4	4	4	4	3	3	4	4	I don't know
2020-07-21 17:48:47	female	20	Catholic	Not taken	Usually	Not taken	Not taken	Not taken	4	Agree	3	4	4	4	3	4	3	3	4	4	4	4	4	4	4	4	4	4	4	4	4	4	4	4	4	3	3	4	4	4	4	4	4	4	4	3	4	4	I know
2020-07-21 17:58:55	female	23	Christian	Not taken	Usually	Not taken	Not taken	Not taken	4	Agree	4	4	4	4	3	4	3	4	4	4	4	4	4	4	4	4	4	4	4	4	4	4	4	4	4	4	4	4	4	4	4	4	4	4	4	4	4	4	I know
2020-07-21 18:52:34	female	20	Catholic	Not taken	Usually	Not taken	Not taken	Not taken	4	Agree	3	3	4	4	4	4	4	3	4	4	4	4	4	4	4	4	4	4	4	4	4	4	4	4	4	4	4	4	4	4	4	4	4	4	4	4	4	4	I don't know
2020-07-21 19:14:22	female	21	Christian	Not taken	Usually	Not taken	Not taken	Not taken	4	Agree	4	4	4	4	4	4	4	4	4	4	4	4	4	4	4	4	4	4	4	4	4	4	4	4	4	4	4	4	4	4	4	4	4	4	4	4	4	4	I know
2020-07-21 20:21:14	female	21	No religion	Not taken	Usually	Not taken	Not taken	Not taken	3	Agree	3	2	4	4	2	3	2	4	4	4	4	4	4	4	4	4	4	4	4	4	4	4	4	4	4	4	4	4	4	4	4	4	4	4	4	3	4	4	I don't know
2020-07-21 22:05:21	female	21	Christian	Not taken	Need	Not taken	Not taken	Not taken	4	Agree	4	4	4	4	3	4	4	4	4	4	4	4	4	4	4	4	4	4	4	4	4	4	4	4	4	4	4	4	4	4	4	4	4	4	4	4	4	4	I know
2020-07-21 22:35:09	female	22	No religion	Not taken	Usually	Not taken	Not taken	Not taken	3	Agree	3	3	3	4	3	4	4	4	4	4	4	4	4	4	4	4	4	4	4	4	4	4	4	4	4	4	4	4	4	4	4	4	4	4	4	3	4	4	I don't know
2020-07-21 23:47:37	female	23	No religion	Has taken	Need	Not taken	Not taken	Not taken	5	Agree	4	4	4	4	4	4	4	4	4	4	4	4	4	4	4	4	4	4	4	4	4	4	4	4	4	4	4	4	4	4	4	4	4	4	4	4	4	4	I don't know
2020-07-22 00:17:22	male	23	Christian	Not taken	Usually	Not taken	Not taken	Not taken	4	Agree	2	3	3	3	2	4	4	4	4	4	4	4	4	4	3	4	4	4	4	4	4	4	4	4	4	4	4	4	4	4	4	4	2	4	3	3	4	4	I don't know
2020-07-22 12:55:03	female	23	Buddhism	Not taken	Usually	Not taken	Not taken	Not taken	5	Agree	3	4	4	4	3	4	4	3	4	4	4	4	4	4	4	4	4	4	4	4	4	4	4	4	4	4	3	4	4	4	4	4	4	4	4	4	4	4	I know
2020-07-23 15:17:07	female	20	Christian	Not taken	Usually	Not taken	Not taken	Not taken	4	Agree	4	4	4	4	4	4	4	4	4	4	4	4	4	4	4	4	4	4	4	4	4	4	4	4	4	4	4	4	4	4	4	4	4	4	4	4	4	4	I know
2020-07-27 19:29:11	female	21	No religion	Not taken	Usually	Not taken	Not taken	Not taken	3	Agree	3	3	4	3	2	4	3	4	4	4	4	4	4	4	4	4	4	4	4	4	4	4	4	4	4	4	4	4	4	4	4	4	4	4	4	4	4	4	I know
2020-07-30 09:57:52	female	20	No religion	Not taken	Need	Not taken	Not taken	Not taken	4	Agree	3	4	4	3	3	4	4	4	4	4	4	4	4	4	4	4	4	4	4	4	4	4	4	4	4	4	4	4	4	4	4	4	4	4	4	4	4	4	I know
2020-07-30 11:31:44	female	21	Buddhism	Not taken	Usually	Not taken	Not taken	Not taken	4	Agree	3	3	4	4	3	4	3	3	4	3	4	4	4	4	4	4	4	4	4	4	4	4	4	4	4	4	4	4	4	4	4	4	3	4	3	4	4	4	I know
2020-07-30 11:33:07	female	21	Christian	Not taken	Need	Not taken	Not taken	Not taken	4	Agree	3	3	4	3	3	4	4	4	4	4	4	4	4	4	4	4	4	4	4	4	4	4	4	4	4	4	4	4	4	4	4	4	4	4	3	4	4	4	I know
2020-07-30 11:57:35	female	23	Buddhism	Not taken	Need	Not taken	Not taken	Not taken	4	Agree	3	3	4	3	2	4	3	3	4	3	4	4	4	3	4	4	4	4	4	4	4	4	4	4	3	4	3	4	4	4	4	4	4	4	4	2	3	3	I know
2020-07-30 12:05:57	female	20	No religion	Not taken	Need	Not taken	Not taken	Not taken	5	Agree	4	4	4	4	3	4	4	4	4	4	4	4	4	4	4	4	4	4	4	4	4	4	4	4	4	4	4	4	4	4	4	4	4	4	4	4	4	4	I know
2020-07-30 12:14:20	female	21	No religion	Not taken	Need	Not taken	Not taken	Not taken	4	Agree	4	4	4	4	3	4	4	4	4	4	4	4	4	4	4	4	4	4	4	4	4	4	4	4	4	4	4	4	4	4	4	4	4	4	4	4	4	4	I don't know
2020-07-30 12:38:55	female	21	No religion	Not taken	Need	Not taken	Not taken	Not taken	4	Agree	4	4	4	4	3	4	3	4	4	4	4	4	4	4	4	4	4	4	4	4	4	4	4	4	4	4	4	4	4	4	4	4	4	4	4	4	4	4	I don't know
2020-07-30 12:42:32	male	24	No religion	Not taken	Need	Has taken	Not taken	Has taken	4	Agree	3	3	3	3	2	4	3	3	3	4	4	4	4	4	4	4	4	4	4	4	4	4	4	4	4	4	4	4	4	3	4	3	3	4	3	3	4	4	I know
2020-07-30 12:44:46	female	22	No religion	Not taken	Usually	Not taken	Not taken	Not taken	4	Agree	3	4	4	3	3	4	4	4	4	4	4	4	4	4	4	4	4	4	4	4	4	4	4	4	4	4	4	4	4	4	4	4	4	4	4	4	4	4	I know
2020-07-30 12:45:04	female	24	Catholic	Not taken	Need	Not taken	Not taken	Not taken	4	Agree	3	3	4	3	3	3	3	4	3	4	4	4	4	3	3	3	4	4	4	4	4	4	3	3	4	3	3	3	3	4	4	4	4	4	4	3	4	4	I know
2020-07-30 12:58:33	female	20	No religion	Not taken	Usually	Not taken	Not taken	Not taken	4	Agree	3	3	4	3	2	4	2	3	4	4	4	4	4	4	4	4	4	4	4	4	4	4	4	4	4	4	4	4	4	4	4	4	4	4	4	3	4	4	I know
2020-07-30 13:21:57	female	20	No religion	Not taken	Need	Not taken	Not taken	Not taken	4	Agree	3	3	4	3	4	4	4	4	4	3	4	4	4	4	4	4	4	4	4	4	4	4	4	4	3	3	3	3	3	3	4	4	4	4	3	3	3	3	I don't know
2020-07-30 13:26:29	female	20	Christian	Not taken	Usually	Not taken	Not taken	Not taken	4	Agree	3	4	4	4	4	4	4	4	4	4	4	4	4	4	4	4	4	4	4	4	4	4	4	4	4	4	4	4	4	4	4	4	4	4	4	4	4	4	I don't know
2020-07-30 13:42:10	female	22	No religion	Not taken	Usually	Not taken	Not taken	Not taken	3	Agree	1	3	3	3	2	3	3	4	4	4	4	4	4	4	4	4	4	4	4	4	4	4	4	4	4	4	4	4	4	4	4	4	4	4	4	3	4	4	I know
2020-07-30 14:08:27	female	20	Christian	Not taken	Need	Not taken	Not taken	Not taken	4	Agree	4	4	3	4	3	4	4	3	4	4	4	4	4	4	4	3	4	4	4	4	4	4	4	3	3	4	3	4	3	3	4	4	3	3	4	3	3	3	I know
2020-07-30 14:19:20	female	20	No religion	Not taken	Usually	Not taken	Not taken	Not taken	4	Agree	3	3	4	4	3	4	3	4	4	4	4	4	4	4	4	3	4	4	4	4	4	4	4	3	4	3	3	4	4	3	4	4	4	4	3	3	3	3	I know
2020-07-30 14:28:47	female	34	Christian	Not taken	Need	Not taken	Not taken	Not taken	4	Agree	4	4	4	4	4	4	4	4	4	4	4	4	4	4	4	4	4	4	4	4	4	4	4	4	4	4	4	4	4	4	4	4	4	4	4	4	4	4	I know
2020-07-30 14:49:48	male	29	No religion	Not taken	Need	Not taken	Not taken	Not taken	4	Agree	3	3	3	4	3	4	3	4	3	4	4	4	2	4	4	3	4	4	4	4	4	4	4	3	3	4	3	4	4	4	4	4	3	4	3	3	3	4	I know
2020-07-30 14:57:54	female	20	No religion	Not taken	Need	Not taken	Not taken	Not taken	5	Agree	3	3	4	3	3	4	4	3	4	4	4	4	4	4	4	4	4	4	4	4	4	4	4	4	4	4	4	4	4	4	4	4	4	4	4	4	4	4	I know
2020-07-30 15:08:05	female	27	No religion	Not taken	Need	Not taken	Not taken	Not taken	3	Agree	3	3	4	4	3	3	3	4	3	3	4	4	4	4	4	3	4	4	4	4	4	4	4	4	4	4	4	4	4	4	4	4	4	4	3	3	4	4	I know
2020-07-30 15:18:41	female	22	Christian	Not taken	Usually	Not taken	Not taken	Not taken	4	Agree	3	3	4	4	3	4	3	4	4	4	4	4	4	4	3	4	4	3	4	4	4	4	4	4	4	4	4	4	4	4	4	4	4	4	4	4	4	4	I know
2020-07-30 15:38:52	female	22	Christian	Not taken	Usually	Not taken	Not taken	Not taken	4	Agree	3	3	4	4	3	4	3	4	4	3	4	4	4	4	3	4	4	4	4	4	4	4	4	4	4	4	4	4	4	4	4	4	4	4	4	4	4	4	I don't know
2020-07-30 16:09:05	female	20	Christian	Not taken	Usually	Not taken	Not taken	Not taken	3	Agree	3	3	4	3	3	3	2	3	4	4	4	4	4	4	3	4	4	4	4	4	4	4	4	4	4	4	3	4	4	3	4	4	3	4	3	3	3	4	I don't know
2020-07-30 16:38:53	male	22	Christian	Not taken	Need	Not taken	Not taken	Not taken	3	Agree	4	4	4	4	3	3	3	3	4	3	3	4	4	4	4	4	4	4	4	4	4	4	4	4	4	3	3	4	4	4	3	3	3	3	4	4	4	4	I know
2020-07-30 16:53:59	female	21	Christian	Not taken	Need	Not taken	Not taken	Not taken	5	Agree	2	4	4	4	3	4	3	4	3	4	4	4	4	4	3	4	4	4	4	4	4	4	4	4	2	3	4	4	3	4	4	4	4	4	4	4	4	4	I know
2020-07-30 16:55:39	female	21	No religion	Not taken	Need	Not taken	Not taken	Not taken	3	Agree	1	1	1	1	1	1	1	1	1	1	1	1	1	1	1	1	1	1	2	1	1	1	1	1	1	1	1	1	1	1	1	1	1	1	1	1	1	1	I don't know
2020-07-30 19:42:18	female	20	No religion	Not taken	Need	Not taken	Not taken	Not taken	5	Agree	3	4	4	4	4	4	4	4	4	4	4	4	4	4	4	4	4	4	4	4	4	4	4	4	4	4	4	4	4	4	4	4	4	4	4	4	4	4	I don't know
2020-07-31 13:39:36	female	21	Catholic	Not taken	Need	Not taken	Not taken	Not taken	5	Agree	4	4	4	4	3	3	3	4	3	4	4	4	4	4	4	4	4	4	4	4	4	4	4	4	4	4	4	4	4	4	4	4	3	4	4	4	4	4	I know
2020-07-31 13:52:40	female	20	No religion	Not taken	Need	Not taken	Not taken	Not taken	4	Agree	3	3	3	4	3	4	4	4	3	4	4	4	4	4	4	4	4	4	4	4	4	4	4	4	4	4	4	4	4	4	4	4	4	4	3	4	4	4	I don't know
2020-07-31 22:35:02	female	21	Buddhism	Not taken	Need	Not taken	Not taken	Not taken	4	Agree	3	4	4	4	3	4	4	4	4	4	4	4	4	4	4	4	4	4	4	4	4	4	4	4	4	4	4	4	4	4	4	4	4	4	4	4	4	4	I know
2020-08-01 17:57:13	female	23	No religion	Not taken	Usually	Not taken	Not taken	Not taken	4	Agree	4	3	4	3	3	4	3	3	4	4	4	4	4	4	3	4	4	4	4	4	4	4	4	3	3	3	3	4	3	4	4	4	4	4	3	3	3	4	I know
2020-08-02 14:41:45	male	23	No religion	Not taken	Need	Not taken	Not taken	Not taken	4	Agree	3	3	4	4	3	4	4	2	4	4	4	4	4	4	3	3	4	4	4	4	4	4	4	4	4	4	4	4	4	4	4	4	4	4	4	4	4	4	I know
2020-08-02 14:48:53	female	21	Christian	Not taken	Usually	Not taken	Not taken	Not taken	4	Agree	3	4	4	4	3	4	4	4	4	4	4	4	4	4	4	4	4	4	4	4	4	4	4	3	3	4	4	4	3	4	4	4	3	4	3	4	4	4	I don't know
2020-08-02 15:11:05	female	41	Christian	Has taken	Need	Not taken	Not taken	Not taken	4	Agree	4	4	4	4	3	4	4	4	4	4	4	4	4	4	4	4	4	4	4	4	4	4	4	4	4	4	4	4	4	4	4	4	4	4	4	3	4	4	I know
2020-08-02 16:10:41	male	23	No religion	Has taken	Usually	Not taken	Not taken	Not taken	4	Agree	2	3	2	3	1	4	2	3	3	3	3	3	3	3	3	3	4	4	4	4	4	4	4	4	4	4	4	4	4	3	4	4	3	3	3	3	4	3	I know
2020-08-02 16:32:25	female	21	Buddhism	Not taken	Need	Not taken	Not taken	Not taken	5	Agree	2	3	3	2	3	3	4	2	3	4	4	4	4	4	4	4	4	4	4	4	4	4	4	4	4	4	4	4	4	4	4	4	4	4	4	4	4	4	I know
2020-08-02 16:36:55	female	23	No religion	Not taken	Need	Not taken	Not taken	Not taken	3	Agree	3	3	4	4	3	4	3	3	4	4	4	4	4	3	4	4	4	4	4	4	4	4	4	4	4	4	4	4	4	4	4	4	4	4	4	3	4	4	I know
2020-08-02 16:46:48	female	23	No religion	Not taken	Need	Not taken	Not taken	Not taken	5	Agree	2	3	4	4	2	4	2	2	4	4	4	4	4	4	4	4	4	4	4	4	4	4	3	4	4	4	4	4	4	4	4	4	4	4	3	3	4	4	I know
2020-08-02 17:12:08	female	23	Buddhism	Has taken	Need	Not taken	Not taken	Not taken	5	Agree	4	3	4	3	3	4	4	4	4	4	4	4	4	4	4	4	4	4	4	4	4	4	4	2	3	4	4	4	4	4	4	4	3	4	4	4	3	4	I don't know
2020-08-02 18:34:18	female	21	No religion	Not taken	Usually	Not taken	Not taken	Not taken	4	Agree	3	3	4	4	2	4	3	4	4	4	4	4	4	4	4	3	4	4	4	4	4	4	4	4	4	4	4	4	4	4	4	4	4	4	4	4	4	4	I know
2020-08-02 18:40:25	female	21	No religion	Not taken	Usually	Not taken	Not taken	Not taken	4	Agree	2	3	4	3	2	4	3	4	4	4	4	4	4	4	4	4	4	4	4	4	4	4	4	4	4	4	4	4	4	4	4	4	4	4	4	4	4	4	I know
2020-08-03 09:55:03	female	21	Christian	Not taken	Usually	Not taken	Not taken	Not taken	3	Agree	3	3	4	4	4	4	3	4	4	4	4	3	3	4	3	4	4	4	4	4	4	4	4	3	3	4	3	4	3	4	3	4	4	4	3	3	3	3	I know
2020-08-03 16:11:56	female	22	No religion	Not taken	Usually	Not taken	Not taken	Not taken	4	Agree	2	3	3	4	2	4	3	2	3	3	4	4	4	4	3	3	4	4	4	4	4	4	4	4	4	4	4	4	4	3	4	4	4	3	3	3	4	4	I don't know
2020-08-03 18:37:22	female	23	Catholic	Has taken	Usually	Not taken	Not taken	Not taken	4	Agree	3	4	4	4	3	4	3	4	4	4	4	4	4	4	4	4	4	4	4	4	4	4	4	4	4	4	4	4	4	4	4	4	4	4	4	4	4	4	I know
2020-08-03 23:54:02	female	22	No religion	Not taken	Need	Not taken	Not taken	Not taken	4	Agree	4	4	4	4	4	4	4	4	4	4	4	4	4	4	4	4	4	4	4	4	4	4	4	4	4	4	4	4	4	4	4	4	4	4	4	4	4	4	I don't know
2020-08-05 08:02:03	female	21	Buddhism	Not taken	Need	Not taken	Not taken	Not taken	5	Agree	3	3	4	4	3	4	4	4	4	4	4	4	4	4	4	4	4	4	4	4	4	4	4	3	3	4	4	4	4	4	4	4	4	4	4	4	4	4	I know
2020-08-05 09:21:29	female	20	No religion	Not taken	Need	Not taken	Not taken	Not taken	5	Agree	3	4	4	4	3	4	3	4	4	4	4	4	4	4	4	4	4	4	4	4	4	4	4	4	4	4	4	4	4	4	4	4	4	4	4	4	4	4	I know
2020-08-05 14:05:37	male	26	Catholic	Not taken	Usually	Not taken	Not taken	Not taken	2	Agree	4	4	4	4	4	4	4	4	4	4	4	4	4	4	4	4	4	4	4	4	4	4	4	4	4	4	4	4	4	4	4	4	4	4	4	4	4	4	I know
2020-08-05 14:15:17	female	21	No religion	Not taken	Need	Not taken	Not taken	Not taken	5	Agree	4	3	4	4	3	4	4	4	3	4	4	4	4	4	4	4	4	4	4	4	4	4	4	4	4	4	4	4	4	4	4	4	4	4	3	3	3	4	I know
2020-08-05 14:35:15	female	23	Buddhism	Not taken	Usually	Not taken	Not taken	Not taken	4	Agree	4	4	4	4	3	4	4	4	4	4	4	4	4	4	4	4	4	4	4	4	4	4	4	4	4	4	4	4	4	4	4	4	4	4	4	4	4	4	I know
2020-08-05 16:13:17	female	24	Catholic	Not taken	Need	Not taken	Not taken	Not taken	3	Agree	3	2	4	3	1	4	2	4	4	4	4	4	4	4	3	4	4	4	4	4	4	4	4	1	1	2	2	3	2	4	4	4	4	4	3	1	2	4	I know
2020-08-06 01:02:37	female	21	No religion	Not taken	Usually	Not taken	Not taken	Not taken	4	Agree	3	4	4	4	3	4	3	4	4	4	4	4	4	4	4	4	4	4	4	4	4	4	4	3	3	4	4	4	4	4	4	4	4	4	4	4	4	4	I know
2020-08-06 09:11:12	female	23	Christian	Has taken	Need	Not taken	Not taken	Not taken	3	Agree	2	3	3	3	2	3	3	3	4	3	3	3	3	3	3	3	4	4	4	4	4	4	4	3	2	3	2	3	3	2	3	4	3	4	3	4	4	4	I know
2020-08-06 10:27:13	male	23	No religion	Not taken	Need	Not taken	Not taken	Not taken	5	Agree	3	4	3	3	3	3	3	2	4	3	4	3	3	3	3	3	4	4	4	4	4	4	3	3	4	3	4	4	4	4	4	4	4	4	3	4	4	4	I don't know
2020-08-06 13:44:44	female	22	No religion	Has taken	Need	Not taken	Not taken	Not taken	4	Agree	4	4	4	4	4	4	4	4	4	4	4	4	4	4	4	4	4	4	4	4	4	4	4	4	4	4	4	4	4	4	4	4	4	4	4	4	4	4	I know
2020-08-07 20:59:59	female	23	No religion	Not taken	Need	Not taken	Not taken	Not taken	5	Agree	3	3	3	3	3	4	3	4	4	4	4	4	4	4	4	4	4	4	4	4	4	4	4	4	4	4	4	4	4	4	4	4	4	4	4	4	3	4	I know
2020-08-07 21:12:06	female	21	Buddhism	Not taken	Need	Not taken	Not taken	Not taken	4	Agree	4	4	4	4	4	4	3	4	4	4	4	4	4	4	4	4	4	4	4	4	4	4	4	4	4	4	4	4	4	4	4	4	4	4	4	4	4	4	I know
2020-08-07 21:21:45	female	23	No religion	Not taken	Unnecessary	Not taken	Not taken	Has taken	4	Opposition	3	4	3	3	1	4	1	4	3	4	4	4	4	4	2	4	4	4	4	4	4	4	4	4	4	4	4	4	4	4	3	4	3	4	2	3	3	3	I don't know
2020-08-07 21:28:05	female	24	No religion	Not taken	Need	Not taken	Not taken	Not taken	5	Agree	3	3	4	3	4	4	4	4	4	4	4	4	4	4	4	4	4	4	4	4	4	4	4	4	4	4	4	4	4	4	4	4	4	4	4	4	4	4	I don't know
2020-08-07 21:39:18	female	22	No religion	Not taken	Usually	Not taken	Not taken	Not taken	4	Agree	1	1	1	1	1	1	1	1	1	1	1	1	1	1	1	1	1	1	1	1	1	1	1	1	1	1	1	1	1	1	1	1	1	1	1	1	1	1	I know
2020-08-07 23:22:43	female	32	No religion	Has taken	Need	Not taken	Not taken	Not taken	4	Agree	3	3	3	3	3	3	3	3	4	3	3	3	3	3	3	3	4	4	4	4	4	4	4	4	4	4	4	4	4	4	4	4	4	4	4	4	4	4	I know
2020-08-08 02:02:20	female	32	Christian	Not taken	Need	Not taken	Not taken	Not taken	5	Agree	4	4	4	4	4	4	4	4	4	4	4	4	4	4	4	4	4	4	4	4	4	4	4	4	4	4	4	4	4	4	4	4	4	4	4	4	4	4	I don't know
2020-08-08 03:06:24	female	21	No religion	Has taken	Need	Not taken	Not taken	Not taken	4	Agree	3	4	4	4	3	4	4	4	4	4	4	4	4	4	4	4	4	4	4	4	4	4	4	4	4	4	4	4	4	4	4	4	4	4	4	3	4	4	I don't know
2020-08-08 06:13:26	female	23	No religion	Not taken	Need	Not taken	Not taken	Not taken	5	Agree	2	3	4	4	3	4	3	3	3	4	4	4	4	3	4	3	4	4	4	4	3	4	4	4	3	4	3	4	4	3	4	3	4	4	3	4	4	4	I know
2020-08-08 11:59:34	female	21	Buddhism	Not taken	Need	Not taken	Not taken	Not taken	4	Agree	2	3	3	4	2	4	3	4	4	3	4	4	4	4	4	3	4	4	4	4	4	4	4	4	4	4	4	4	4	4	4	4	4	4	4	3	4	4	I know
2020-08-12 11:36:51	female	20	Christian	Not taken	Usually	Not taken	Not taken	Not taken	4	Agree	3	3	4	3	3	4	4	3	4	4	4	4	4	4	4	4	4	4	4	4	4	4	4	4	4	4	3	4	4	4	4	4	3	4	3	4	4	4	I know
2020-08-13 18:08:41	female	25	Christian	Not taken	Need	Not taken	Not taken	Not taken	5	Agree	3	3	4	4	4	4	4	4	4	4	4	4	4	4	4	4	4	4	4	4	4	4	4	4	4	4	4	4	4	4	4	4	4	4	4	4	4	4	I know
2020-08-13 18:17:46	female	22	No religion	Has taken	Usually	Not taken	Not taken	Not taken	4	Agree	3	3	4	3	3	4	3	4	4	4	4	4	4	4	4	4	4	4	4	4	4	4	4	4	4	4	4	4	4	4	4	4	4	4	4	3	4	4	I know
2020-08-15 16:15:19	female	23	Christian	Has taken	Need	Not taken	Not taken	Not taken	4	Agree	4	4	4	4	4	4	4	4	4	4	4	4	4	4	4	4	4	4	4	4	4	4	4	4	4	4	4	4	4	4	4	4	4	4	4	4	4	4	I know
time stamp	gender	age	Religion	Education course about elder abuse	Need for education	Experienced elder abuse	Intervening Elder Abuse	No Intervening Elder Abuse	Elder abuse problem	Elder Abuse Reporting Act	Awareness of elder abuse1	Awareness of elder abuse2	Awareness of elder abuse3	Awareness of elder abuse4	Awareness of elder abuse5	Awareness of elder abuse6	Awareness of elder abuse7	Awareness of elder abuse8	Awareness of elder abuse9	Awareness of elder abuse10	Awareness of elder abuse11	Awareness of elder abuse12	Awareness of elder abuse13	Awareness of elder abuse14	Awareness of elder abuse15	Awareness of elder abuse16	Awareness of elder abuse17	Awareness of elder abuse18	Awareness of elder abuse19	Awareness of elder abuse20	Awareness of elder abuse21	Awareness of elder abuse22	Awareness of elder abuse23	Awareness of elder abuse24	Awareness of elder abuse25	Awareness of elder abuse26	Awareness of elder abuse27	Awareness of elder abuse28	Awareness of elder abuse29	Awareness of elder abuse30	Awareness of elder abuse31	Awareness of elder abuse32	Awareness of elder abuse33	Awareness of elder abuse34	Awareness of elder abuse35	Awareness of elder abuse36	Awareness of elder abuse37	Awareness of elder abuse38	Knowledge1
[truncated: 36 more columns]

## Sheet: coding
	0	1	2	3	4	5
gender		male	female
age		number
Religion		Buddhism	Christian	Catholic	No religion
Education course about elder abuse		Has taken	Not taken
Need for education		Unnecessary	Usually	Need
Experienced elder abuse		Has taken	Not taken
Intervening Elder Abuse		Has taken	Not taken
Elder abuse problem		Not very serious	not serious	serious	Very serious
Elder Abuse Reporting Act		Opposition	Agree
Awareness of elder abuse1		Strongly Disagree	Disagree	Agree	Strongly Agree
Awareness of elder abuse2		Strongly Disagree	Disagree	Agree	Strongly Agree
Awareness of elder abuse 3		Strongly Disagree	Disagree	Agree	Strongly Agree
Awareness of elder abuse 4		Strongly Disagree	Disagree	Agree	Strongly Agree
Awareness of elder abuse 5.		Strongly Disagree	Disagree	Agree	Strongly Agree
Awareness of elder abuse 6.		Strongly Disagree	Disagree	Agree	Strongly Agree
Awareness of elder abuse 7		Strongly Disagree	Disagree	Agree	Strongly Agree
Awareness of elder abuse 8.		Strongly Disagree	Disagree	Agree	Strongly Agree
Awareness of elder abuse 9		Strongly Disagree	Disagree	Agree	Strongly Agree
Awareness of elder abuse 10		Strongly Disagree	Disagree	Agree	Strongly Agree
Awareness of elder abuse 11		Strongly Disagree	Disagree	Agree	Strongly Agree
Awareness of elder abuse 12.		Strongly Disagree	Disagree	Agree	Strongly Agree
Awareness of elder abuse 13		Strongly Disagree	Disagree	Agree	Strongly Agree
Awareness of elder abuse 14		Strongly Disagree	Disagree	Agree	Strongly Agree
Awareness of elder abuse 15		Strongly Disagree	Disagree	Agree	Strongly Agree
Awareness of elder abuse 16		Strongly Disagree	Disagree	Agree	Strongly Agree
Awareness of elder abuse 17		Strongly Disagree	Disagree	Agree	Strongly Agree
Awareness of elder abuse 18		Strongly Disagree	Disagree	Agree	Strongly Agree
Awareness of elder abuse 19		Strongly Disagree	Disagree	Agree	Strongly Agree
Awareness of elder abuse 20		Strongly Disagree	Disagree	Agree	Strongly Agree
Awareness of elder abuse 21		Strongly Disagree	Disagree	Agree	Strongly Agree
Awareness of elder abuse 22		Strongly Disagree	Disagree	Agree	Strongly Agree
Awareness of elder abuse 23		Strongly Disagree	Disagree	Agree	Strongly Agree
Awareness of elder abuse 24		Strongly Disagree	Disagree	Agree	Strongly Agree
Awareness of elder abuse 25		Strongly Disagree	Disagree	Agree	Strongly Agree
Awareness of elder abuse 26		Strongly Disagree	Disagree	Agree	Strongly Agree
Awareness of elder abuse 27		Strongly Disagree	Disagree	Agree	Strongly Agree
Awareness of elder abuse 28		Strongly Disagree	Disagree	Agree	Strongly Agree
Awareness of elder abuse 29		Strongly Disagree	Disagree	Agree	Strongly Agree
Awareness of elder abuse 30		Strongly Disagree	Disagree	Agree	Strongly Agree
Awareness of elder abuse 31		Strongly Disagree	Disagree	Agree	Strongly Agree
Awareness of elder abuse 32		Strongly Disagree	Disagree	Agree	Strongly Agree
Awareness of elder abuse 33		Strongly Disagree	Disagree	Agree	Strongly Agree
Awareness of elder abuse 34		Strongly Disagree	Disagree	Agree	Strongly Agree
Awareness of elder abuse 35		Strongly Disagree	Disagree	Agree	Strongly Agree
Awareness of elder abuse 36.		Strongly Disagree	Disagree	Agree	Strongly Agree
Awareness of elder abuse 37		Strongly Disagree	Disagree	Agree	Strongly Agree
Awareness of elder abuse 38		Strongly Disagree	Disagree	Agree	Strongly Agree
Knowledge1	I don't know	I know
Knowledge2	I don't know	I know
Knowledge3	I don't know	I know
Knowledge4	I don't know	I know
Knowledge5	I don't know	I know
Knowledge6	I don't know	I know
Knowledge7	I don't know	I know
Knowledge8	I don't know	I know
Knowledge9	I don't know	I know
Knowledge10	I don't know	I know
Knowledge11	I don't know	I know
Knowledge12	I don't know	I know
Attitude1		Strongly Disagree	Disagree	Agree	Strongly Agree
Attitude2		Strongly Disagree	Disagree	Agree	Strongly Agree
Attitude3		Strongly Disagree	Disagree	Agree	Strongly Agree
Attitude4		Strongly Disagree	Disagree	Agree	Strongly Agree
Attitude5		Strongly Disagree	Disagree	Agree	Strongly Agree
Attitude6		Strongly Disagree	Disagree	Agree	Strongly Agree
Attitude7		Strongly Disagree	Disagree	Agree	Strongly Agree
Attitude8		Strongly Disagree	Disagree	Agree	Strongly Agree
Attitude9		Strongly Disagree	Disagree	Agree	Strongly Agree
Attitude10		Strongly Disagree	Disagree	Agree	Strongly Agree
Attitude11		Strongly Disagree	Disagree	Agree	Strongly Agree
Attitude12		Strongly Disagree	Disagree	Agree	Strongly Agree
Attitude13		Strongly Disagree	Disagree	Agree	Strongly Agree
Attitude14		Strongly Disagree	Disagree	Agree	Strongly Agree
Intention of intervening in elder abuse1		Strongly Disagree	Disagree	Agree	Strongly Agree
Intention of intervening in elder abuse2		Strongly Disagree	Disagree	Agree	Strongly Agree
Intention of intervening in elder abuse3		Strongly Disagree	Disagree	Agree	Strongly Agree
Intention of intervening in elder abuse4		Strongly Disagree	Disagree	Agree	Strongly Agree
Intention of intervening in elder abuse5		Strongly Disagree	Disagree	Agree	Strongly Agree
Intention of intervening in elder abuse6		Strongly Disagree	Disagree	Agree	Strongly Agree
Intention of intervening in elder abuse7		Strongly Disagree	Disagree	Agree	Strongly Agree
Intention of intervening in elder abuse8		Strongly Disagree	Disagree	Agree	Strongly Agree
Intention of intervening in elder abuse9		Strongly Disagree	Disagree	Agree	Strongly Agree
Intention of intervening in elder abuse10		Strongly Disagree	Disagree	Agree	Strongly Agree
Intention of intervening in elder abuse11		Strongly Disagree	Disagree	Agree	Strongly Agree
